# Supplementary material
Source: publisher figshare collection journal article supplement (https://tandf.figshare.com/ndownloader/files/12818750)
Supplement: Supplementary file 1 [file 12818750]

| Supplemental Data  Supplementary Table 1. Survey participants who screened out | |
| --- | --- |
|  | Number of physicians  screened out at each question  N=186*  n (%) |
| Low current volume of B-cell ALL patients (fewer than 5) | 98 (53%) |
| Lack of appropriate board certification | 46 (25%) |
| Does not currently use MRD testing for ALL patients | 31 (17%) |
| Not enough years in practice | 8 (4%) |
| Not enough time spent in direct patient care | 7 (4%) |
| Hematology or oncology not primary specialty | 6 (3%) |
| Affiliation with pharmaceutical company | 6 (3%) |
| Primary hospital affiliation | 3 (2%) |

*Counts not mutually exclusive

Supplementary Figure 1. MRD Tests Used by Adult and Pediatric Treaters


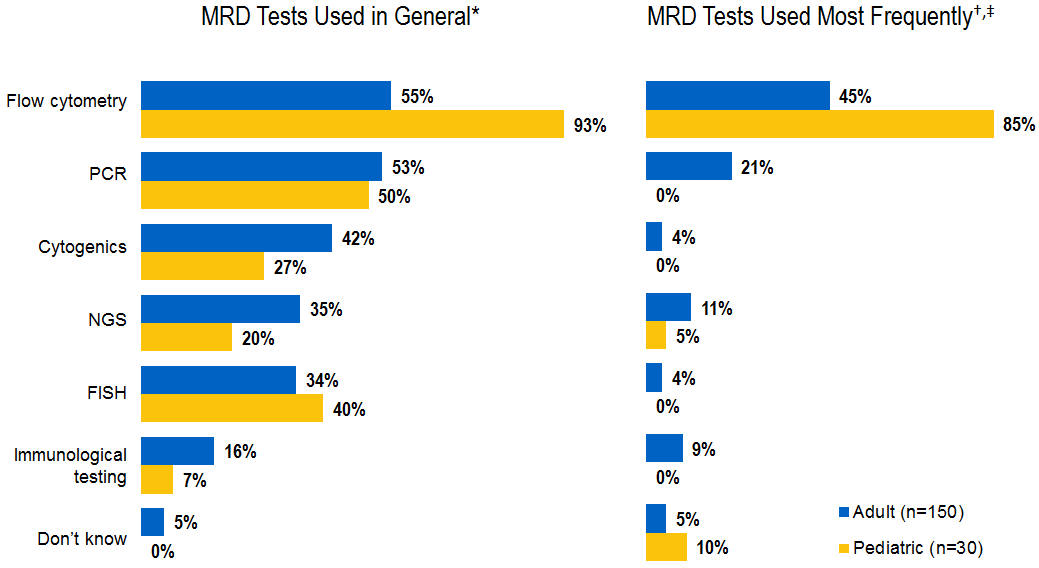


% of physicians

*Multiple responses were allowed

†Only one response allowed

‡Base: Adult treater (n=97); Pediatric treater (n=20)
